# Supplementary material for: The Identification and Validation of Hub Genes Associated with Acute Myocardial Infarction Using Weighted Gene Co-Expression Network Analysis
Source: MDPI journal article supplement (doi:10.3390/jcdd9010030), 2022-01-17
Supplement: s1 [file s1]

Table S1. List of the top 50 DEGs in GSE61144

| Gene      | adj. p-value | p-value  | t        | B       | logFC  |
|-----------|--------------|----------|----------|---------|--------|
| C11orf46  | 0.000304     | 1.45E-08 | -8.13778 | 9.51894 | -0.341 |
| CDC91L1   | 0.000304     | 1.73E-08 | -8.06147 | 9.36057 | -0.329 |
| RBMX      | 0.000304     | 1.87E-08 | -8.02808 | 9.29097 | -0.354 |
| MS4A7     | 0.00034      | 2.80E-08 | -7.85511 | 8.92772 | -0.844 |
| EXOSC8    | 0.000426     | 5.06E-08 | -7.60278 | 8.38946 | -0.452 |
| ACTR5     | 0.000426     | 5.50E-08 | -7.56803 | 8.31457 | -0.334 |
| NRD1      | 0.000426     | 7.55E-08 | 7.434865 | 8.02585 | 0.566  |
| FCRL3     | 0.000426     | 7.87E-08 | -7.4176  | 7.98823 | -0.949 |
| LOC440737 | 0.000544     | 1.12E-07 | -7.27136 | 7.66771 | -0.793 |
| C10orf86  | 0.000564     | 1.54E-07 | -7.13885 | 7.37452 | -0.429 |
| PRPS1     | 0.000564     | 1.60E-07 | -7.1222  | 7.3375  | -0.367 |
| ZNF529    | 0.000564     | 1.73E-07 | -7.09107 | 7.26818 | -0.256 |
| PPIE      | 0.000564     | 1.79E-07 | -7.07693 | 7.23666 | -0.455 |
| PTPRE     | 0.000564     | 1.85E-07 | 7.062361 | 7.20413 | 0.453  |
| RPL9      | 0.000587     | 2.11E-07 | -7.00928 | 7.08537 | -0.465 |
| MRPS21    | 0.000587     | 2.17E-07 | -6.99807 | 7.06025 | -0.462 |
| RPS27A    | 0.000657     | 2.56E-07 | -6.92977 | 6.90675 | -0.565 |
| G6PD      | 0.000693     | 2.96E-07 | 6.872063 | 6.77654 | 0.619  |
| LOC168850 | 0.000705     | 3.19E-07 | -6.84134 | 6.70703 | -0.23  |
| NIN       | 0.00078      | 3.83E-07 | 6.767409 | 6.53921 | 0.382  |
| QIL1      | 0.00078      | 4.00E-07 | -6.74909 | 6.49753 | -0.422 |
| MGC2463   | 0.00078      | 4.18E-07 | -6.73202 | 6.45863 | -0.402 |
| RERE      | 0.00078      | 4.30E-07 | 6.720112 | 6.43146 | 0.516  |
| CD44      | 0.00078      | 4.37E-07 | -6.71335 | 6.41603 | -0.339 |
| DDX47     | 0.00078      | 4.57E-07 | -6.6959  | 6.37618 | -0.475 |
| KIAA0372  | 0.00078      | 4.76E-07 | -6.67885 | 6.33722 | -0.435 |
| LOC441246 | 0.00078      | 4.81E-07 | -6.67504 | 6.3285  | -0.697 |
| ACAA2     | 0.000843     | 5.64E-07 | -6.61111 | 6.18198 | -0.462 |
| PAK1      | 0.000843     | 5.71E-07 | 6.60585  | 6.16991 | 0.537  |
| CD47      | 0.000843     | 5.71E-07 | -6.60578 | 6.16976 | -0.42  |
| LOC349236 | 0.000844     | 5.89E-07 | 6.593434 | 6.14138 | 0.655  |
| USP32     | 0.00086      | 6.18E-07 | 6.573954 | 6.09659 | 0.555  |
| ADCY4     | 0.000874     | 6.55E-07 | 6.550814 | 6.04331 | 0.585  |
| FLJ20272  | 0.000874     | 6.65E-07 | -6.54513 | 6.0302  | -0.403 |
| C6orf166  | 0.000874     | 6.97E-07 | 6.526163 | 5.98648 | 0.429  |
| DBP       | 0.000874     | 7.40E-07 | -6.50198 | 5.93065 | -0.215 |
| NHP2L1    | 0.000874     | 7.79E-07 | -6.4817  | 5.88377 | -0.343 |
| FAM36A    | 0.000874     | 7.79E-07 | -6.48164 | 5.88364 | -0.299 |
| LOC645385 | 0.000874     | 7.87E-07 | -6.47749 | 5.87404 | -0.787 |
| GZMK      | 0.000874     | 7.89E-07 | -6.47627 | 5.87122 | -1.52  |
| WDR54     | 0.000908     | 8.39E-07 | -6.45192 | 5.81483 | -0.562 |
| EXOSC10   | 0.000909     | 8.59E-07 | -6.44263 | 5.7933  | -0.392 |
| AOF2      | 0.000944     | 9.11E-07 | -6.41921 | 5.739   | -0.367 |

|           |          |          |          |         |        |
|-----------|----------|----------|----------|---------|--------|
| MDC1      | 0.000971 | 9.67E-07 | -6.39553 | 5.68401 | -0.37  |
| PCGF4     | 0.000971 | 9.77E-07 | -6.39128 | 5.67412 | -0.42  |
| BCL7C     | 0.000981 | 1.01E-06 | -6.37894 | 5.64544 | -0.319 |
| LOC149224 | 0.000985 | 1.03E-06 | -6.36959 | 5.62368 | -0.54  |
| INPP5A    | 0.00101  | 1.08E-06 | 6.351901 | 5.5825  | 0.466  |
| NADK      | 0.001038 | 1.13E-06 | 6.333399 | 5.53939 | 0.671  |
| BCCIP     | 0.001062 | 1.18E-06 | -6.31699 | 5.50112 | -0.281 |

Table S2. List of the top 50 DEGs in the brown module

| Gene      | colorNEW | kMEblue  | kMEbrown | kMEgrey  | kMEturquoise |
|-----------|----------|----------|----------|----------|--------------|
| CCNDBP1   | brown    | 0.677089 | -0.87308 | -0.7335  | -0.51697     |
| PDCD2     | brown    | -0.57421 | 0.810704 | 0.784412 | 0.482102     |
| LOC649049 | brown    | -0.81599 | 0.934625 | 0.835439 | 0.741804     |
| MADD      | brown    | -0.84944 | 0.770199 | 0.752435 | 0.813797     |
| MGMT      | brown    | -0.52787 | 0.801289 | 0.718771 | 0.375899     |
| FAM3C     | brown    | -0.70479 | 0.85749  | 0.817453 | 0.682185     |
| DDX47     | brown    | -0.91749 | 0.909343 | 0.877926 | 0.860684     |
| DDX39     | brown    | -0.7998  | 0.882686 | 0.851569 | 0.768285     |
| LOC646630 | brown    | -0.72326 | 0.766    | 0.681324 | 0.643667     |
| ASF1A     | brown    | -0.61507 | 0.867027 | 0.783575 | 0.525686     |
| NRD1      | brown    | 0.851168 | -0.84976 | -0.87703 | -0.79535     |
| NOL7      | brown    | -0.63956 | 0.78173  | 0.699455 | 0.476235     |
| ZNF259    | brown    | -0.57411 | 0.77582  | 0.66697  | 0.427824     |
| ADARB1    | brown    | -0.85744 | 0.831793 | 0.854621 | 0.879338     |
| CD40      | brown    | -0.47305 | 0.743623 | 0.665612 | 0.362053     |
| LOC221143 | brown    | -0.64181 | 0.837447 | 0.84531  | 0.645069     |
| PDCD7     | brown    | -0.6816  | 0.884543 | 0.806868 | 0.577635     |
| RPLP0     | brown    | -0.80812 | 0.819797 | 0.775202 | 0.802248     |
| MGA       | brown    | -0.40538 | 0.782154 | 0.684436 | 0.281649     |
| LOC648622 | brown    | -0.5577  | 0.864104 | 0.674433 | 0.300723     |
| PSTPIP1   | brown    | 0.675053 | -0.77351 | -0.5615  | -0.36729     |
| SLCO4C1   | brown    | 0.809538 | -0.8199  | -0.75922 | -0.72063     |
| FBXL11    | brown    | 0.869373 | -0.83247 | -0.77273 | -0.74831     |
| CPSF3     | brown    | -0.61802 | 0.774376 | 0.776723 | 0.580867     |
| MYD88     | brown    | 0.858522 | -0.78293 | -0.772   | -0.7944      |
| SOCS2     | brown    | -0.54009 | 0.725891 | 0.571341 | 0.299448     |
| HMG1      | brown    | -0.70215 | 0.864741 | 0.656478 | 0.420687     |
| LOC642817 | brown    | -0.69155 | 0.920724 | 0.743657 | 0.469475     |
| ATG9A     | brown    | 0.73166  | -0.74226 | -0.77435 | -0.7436      |
| WWP1      | brown    | -0.69145 | 0.883762 | 0.831423 | 0.546634     |
| CEBPZ     | brown    | -0.31656 | 0.691373 | 0.606854 | 0.117404     |
| LOC347292 | brown    | -0.59695 | 0.874123 | 0.686718 | 0.35709      |
| LOC644039 | brown    | -0.50708 | 0.85716  | 0.74351  | 0.327588     |
| SETX      | brown    | 0.803397 | -0.72016 | -0.69212 | -0.78582     |
| ZXDB      | brown    | -0.71733 | 0.81025  | 0.856452 | 0.747241     |
| HOP       | brown    | -0.54878 | 0.792151 | 0.624609 | 0.302408     |

|               |       |          |          |          |          |
|---------------|-------|----------|----------|----------|----------|
| RPL3          | brown | -0.8043  | 0.938947 | 0.848476 | 0.71594  |
| RPS20         | brown | -0.79405 | 0.952941 | 0.856749 | 0.683831 |
| ZMYND11       | brown | -0.48998 | 0.849861 | 0.698426 | 0.287815 |
| LOC440733     | brown | -0.86683 | 0.822515 | 0.818049 | 0.857784 |
| DKFZP779L1558 | brown | -0.54022 | 0.843115 | 0.698475 | 0.32388  |
| STK19         | brown | 0.628639 | -0.80286 | -0.70032 | -0.42464 |
| KIAA1949      | brown | 0.681257 | -0.75757 | -0.6747  | -0.44192 |
| DC2           | brown | -0.78499 | 0.809173 | 0.767472 | 0.774327 |
| RPS27A        | brown | -0.7438  | 0.925202 | 0.86605  | 0.640842 |
| COX6C         | brown | -0.88783 | 0.893342 | 0.827248 | 0.811088 |
| DNM1L         | brown | -0.59581 | 0.805104 | 0.736913 | 0.467038 |
| RPL26         | brown | -0.80152 | 0.868839 | 0.775376 | 0.682135 |
| ZC3H8         | brown | -0.55943 | 0.778325 | 0.791767 | 0.506286 |
| MYL6          | brown | 0.800516 | -0.83991 | -0.79117 | -0.70642 |

---

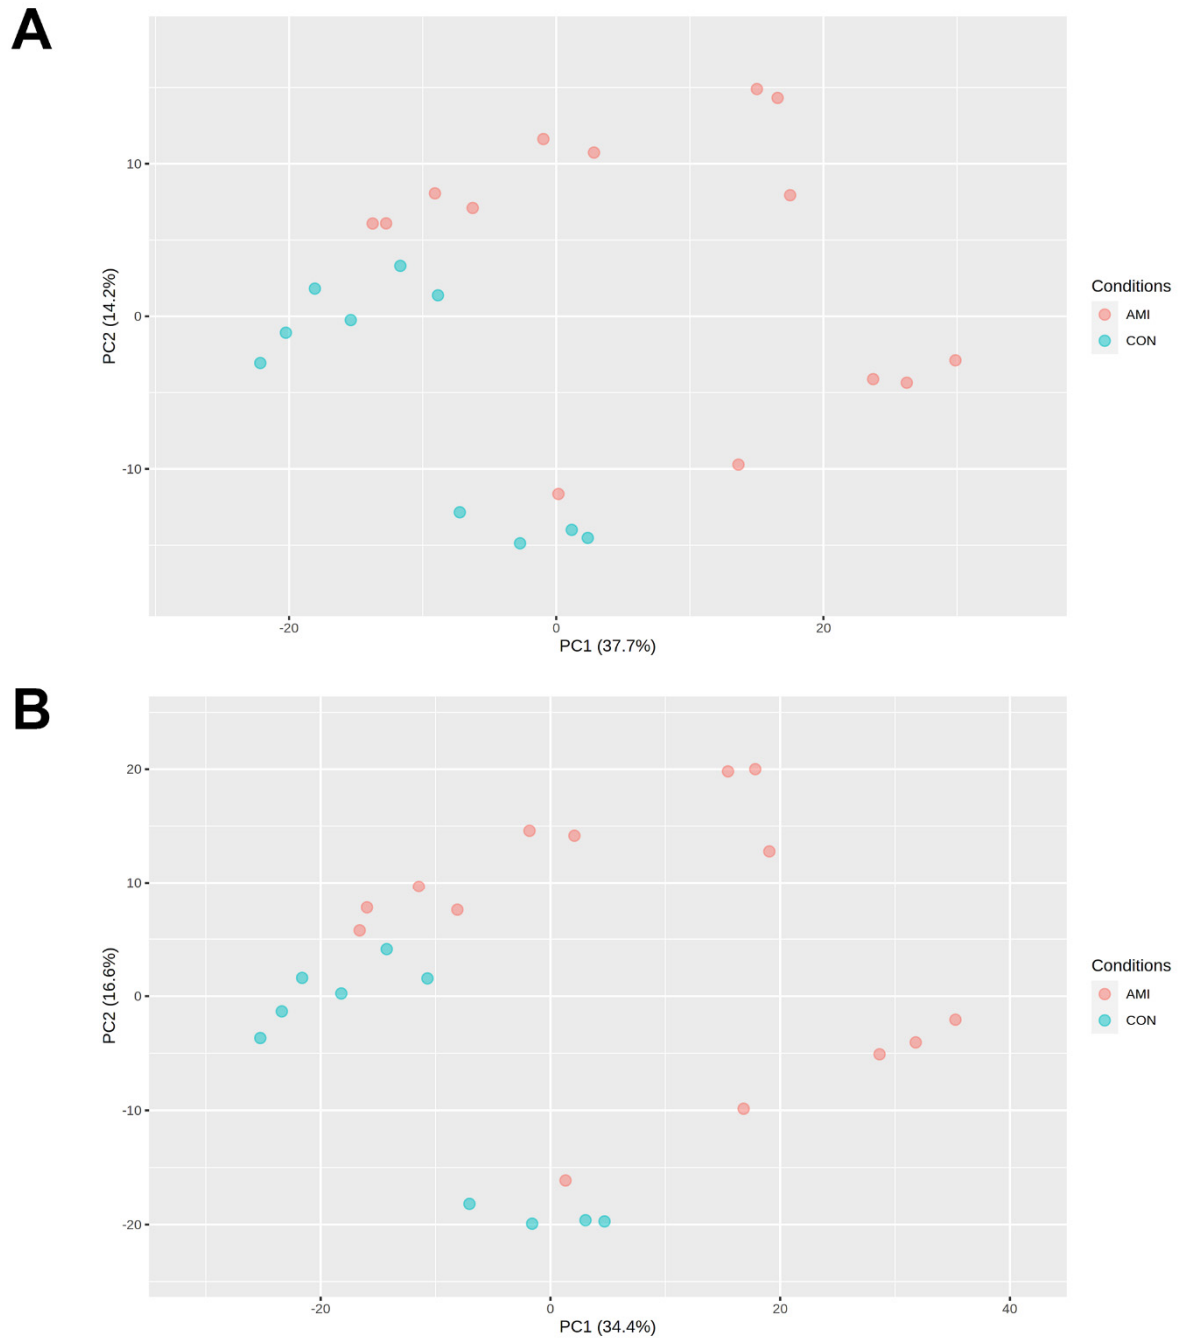

Figure S1. Data quality checking and normalization with log2 transformation. PCA plots before (A) and after (B) batch correction.
